# Supplementary material for: Highly efficient layer-by-layer large-scale manufacturing of polymer solar cells with minimized device-to-device variations by employing benzothiadiazole-based solid additives
Source: Royal Society of Chemistry journal article supplement (doi:10.1039/d2ta04776d), 2022-01-01
Supplement: d2ta04776d1.pdf [file d2ta04776d1.pdf]

## Supporting Information

### Highly Efficient Layer-by-Layer Large-Scale Manufacturing Polymer Solar Cells with Minimized Device-to-Device Variations by Employing Benzothiadiazole-Based Solid Additives

Jiyeon Oh,<sup>†a</sup> Sungwoo Jung,<sup>†a</sup> So-Huei Kang,<sup>a,b</sup> Geunhyung Park,<sup>a</sup> Mingyu Jeong,<sup>a</sup> Seoyoung Kim,<sup>a</sup> Seunglok Lee,<sup>a</sup> Wonjun Kim,<sup>a</sup> Byongkyu Lee,<sup>a</sup> Sang Myeon Lee,<sup>a,c</sup> and Changduk Yang<sup>\*a</sup>

<sup>a</sup> School of Energy and Chemical Engineering, Perovtronics Research Center, Low Dimensional Carbon Materials Center, Ulsan National Institute of Science and Technology (UNIST), 50 UNIST-gil, Ulsu-gun, Ulsan 44919, South Korea.

<sup>b</sup> Department of Chemistry, McGill University, 801 Sherbrooke St West, Montreal, QC H3 A 0b8, Canada

<sup>c</sup> 4th R&D Institute-6th Directorate, Agency for Defense Development, Yuseong-Gu, Daejeon 34186, Korea

<sup>†</sup>J. O and S. J contributed equally to this work

\* E-mail: yang@unist.ac.kr

## Experimental Section

*Materials and instrument:* All the chemicals and reagents were purchased from Sigma-Aldrich, Alfa Aesar chemical company, and Tokyo Chemical Industry Co., Ltd. without any further purification. All solvents were ACS grade unless otherwise noted. BT (2,1,3-Benzothiadiazole) was purchased from Combi-Blocks. FBT and 2FBT were synthesized according to previously reported literature.<sup>[23]</sup> PM6, L-PM6, H-PM6, and H-PTQ10 were synthesized according to the previously reported methods.<sup>[24]</sup> PTQ10 was purchased from Brilliant Matters ( $M_n$ : 19.1 kDa,  $M_w$ : 40.9 kDa, PDI: 2.14). Y6 and BTP-eC9 were purchased from eflexPV. The molecular weights of the PM6 and PTQ10 were characterized with high-temperature gel permeation chromatography (HR-GPC) at 100 °C using polystyrene as the standard in 1,2,4-trichlorobenzene (HPLC grade). The FT-IR absorption spectra were measured on a Varian 670 infrared spectrometer with wavenumber ranging from 1000 to 4000  $\text{cm}^{-1}$ . The solutions for FT-IR absorption spectra were prepared by PM6 films with BT solid additives of optimized weight ratio in chloroform with same concentration of 8mg  $\text{mL}^{-1}$ .

*Synthesis of PM6:* Diorganobromide (500 mg, 0.532 mmol) and diorganostanne (407.6 mg, 0.532 mmol) compounds were dissolved in toluene (22.5 ml) in a two-neck round flask and then purged with argon for 30 min. A solution of  $\text{Pd}(\text{PPh}_3)_4$  (24.6 mg, 0.021 mmol) in anhydrous toluene (2.5 ml) was added to the mixture in one portion in an argon state. Then the mixture was heated at 120 °C in a pre-heated oil bath for 12 h. The resulting polymers were precipitated in methanol, followed by Soxhlet extraction in sequence of methanol, acetone, and n-hexane. Finally, the chloroform fraction was extracted and reprecipitated in methanol to get the target product ( $M_n$ : 41.3 kDa,  $M_w$ : 109.7 kDa, PDI: 2.66).

*Synthesis of L-PM6:* According to the procedure described above, the mixture was heated at 120 °C in a pre-heated oil bath for 9 h to synthesize L-PM6 ( $M_n$ : 30.4 kDa,  $M_w$ : 106.9 kDa, PDI: 3.51).

*Synthesis of H-PM6:* According to the procedure described above, the mixture was heated at 120 °C in a pre-heated oil bath for 36 h to synthesize H-PM6 ( $M_n$ : 49.3 kDa,  $M_w$ : 144.7 kDa, PDI: 2.93).

*Synthesis of H-PTQ10:* 2,5-bis(trimethylstannyl)thiophene (82.0 mg, 0.2 mmol) and 5,8-dibromo-6,7-difluoro-2-((2-hexyldecyl)oxy)quinoxaline (112.9 mg, 0.2 mmol) were dissolved in anhydrous toluene (6 mL) in a long Schlenk flask, and purged with argon for 20 min. Then,

of tetrakis(triphenylphosphine)palladium(0) (6.9 mg, 0.006 mmol) was added and purged again with argon for 20 min. The reaction mixture was stirred at 110 °C for 36 h. After cooling down, the crude mixture was poured into methanol, then transferred to thimble filter. Sequential Soxhlet extraction with methanol, acetone, and hexane was performed to remove low molecular weight fractions. The residue was extracted with chloroform, concentrated, and precipitated to methanol. The purified polymer was collected by filtration and dried in high vacuum oven ( $M_n$ : 46.7 kDa,  $M_w$ : 111.8 kDa, PDI: 2.39).

*Device fabrication and characterization:* The patterned ITO-coated glass substrates were rinsed using detergent, acetone and isopropanol and were subsequently dried overnight in an oven. The substrate size of 1.5 cm x 1.5 cm was employed for the devices with area of 0.048 and 0.92 cm<sup>2</sup>, while the substrate (2.5 cm x 2.5 cm) was used in the device with 2.50 cm<sup>2</sup>. All the LBL PSCs were fabricated using the same conditions and procedures. PM6/Y6 based LBL device was fabricated with a configuration of ITO/PEDOT:PSS/PM6/Y6/PDINO/Al. PEDOT:PSS (Bayer Baytron 4083) was spin-coated at 4000 rpm onto an ITO substrate, followed by annealing at 140 °C for 10 min in air. As for the LBL PSCs, PM6 solution was prepared in chloroform at 8 mg mL<sup>-1</sup> with 10 to 40% (w/w) BT solid additives of the PM6 concentration. Y6 solution was prepared in chloroform at 9 mg mL<sup>-1</sup> with 0.5% CN of the solvent volume. The PM6 solution was spin-coated on the PEDOT:PSS film at 2200 rpm for 60 s, and then annealed at 100 °C for 5 min. Y6 is deposited on the PM6 film at 2300 rpm for 60 s with annealing at 100 °C for 5 min. In case of PTQ10/Y6 based device, PTQ10 and Y6 were prepared at 7 mg mL<sup>-1</sup> and 9 mg mL<sup>-1</sup> respectively. For PM6/BTP-eC9 based device, the device structure of ITO/PEDOT:PSS/PM6/BTP-eC9/PFN-Br/Ag. PM6 was prepared at 7 mg mL<sup>-1</sup> and BTP-eC9 with concentration of 9 mg mL<sup>-1</sup>. The donor polymer film with FBT additive was treated with thermal annealing at 100 °C for 5 min, and then the acceptor film is processed with annealing at 100 °C for 5 min. Then, a methanol solution of PDINO (1.0 mg mL<sup>-1</sup>) or PFN-Br (0.5 mg mL<sup>-1</sup>) was spin-coated onto the active layer with a spin rate of 3000 rpm for 30 s. Finally, a 100 nm Al or Ag cathode was thermally evaporated on top of the substrates under vacuum (<3.0 x 10<sup>-6</sup> Pa).

The *J-V* characteristics were measured on a Keithley 2400 source under the illumination of an AM 1.5G solar simulator with an intensity of 100 mW cm<sup>-2</sup>. EQE measurements were conducted using Model QE-R3011 (Enli Technology) in ambient air. The hole and electron

mobilities were measured via using the SCLC method. Device structures are ITO/PEDOT:PSS/Donor/Acceptor/Au for hole-only devices and ITO/ZnO/Donor/Acceptor/Al for electron-only devices, respectively. The SCLC mobilities were calculated using the Mott–Gurney equation,  $J_{\text{SCLC}} = (9/8)\epsilon_0\epsilon_r\mu((V^2)/(L^3))$ , where  $\epsilon_r$  is the relative dielectric constant of the organic semiconductor,  $\epsilon_0$  is the permittivity of empty space,  $\mu$  is the mobility of zero-field,  $L$  is the thickness of the active layer, and  $V$  is applied voltage across the device. XPS was measured using K-alpha.

*Morphology characterization:* AFM images of thin films were obtained using multimode V microscope (Veeco, USA) with a nanscope controller using Si tips (Bruker). TEM analysis was performed using a JEOL USA JEM-2100F (Cs corrector) transmission electron microscope. GIWAXS was carried out at the PLS-II 6D U-SAXS and 9A beamline of the Pohang Accelerator Laboratory in Korea. The scattering signal was recorded using a 2-D CCD detector (Rayonix SX165). The X-ray light had an energy of 11.24 KeV. The incidence angle of X-rays was adjusted to 0.09-0.12 to maximize the signal to background ratio.

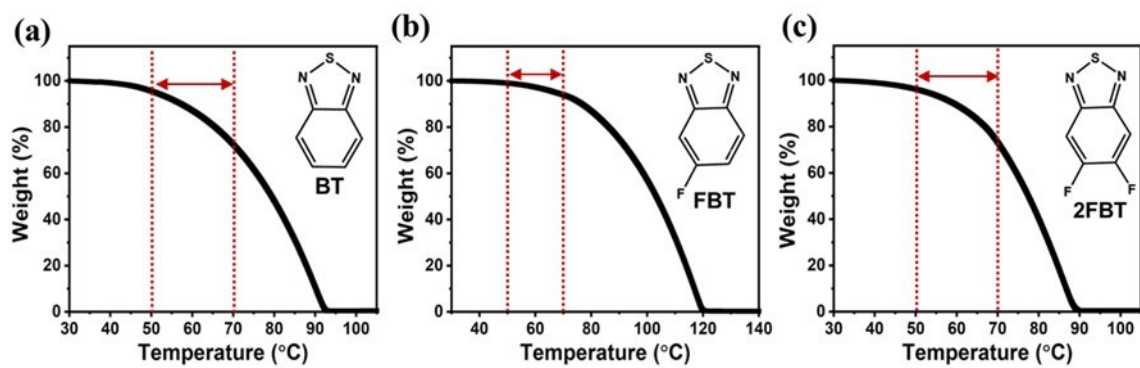

Fig. S1 TGA plots of a) BT, b) FBT and c) 2FBT material at a scan rate of 10 °C min<sup>-1</sup>.

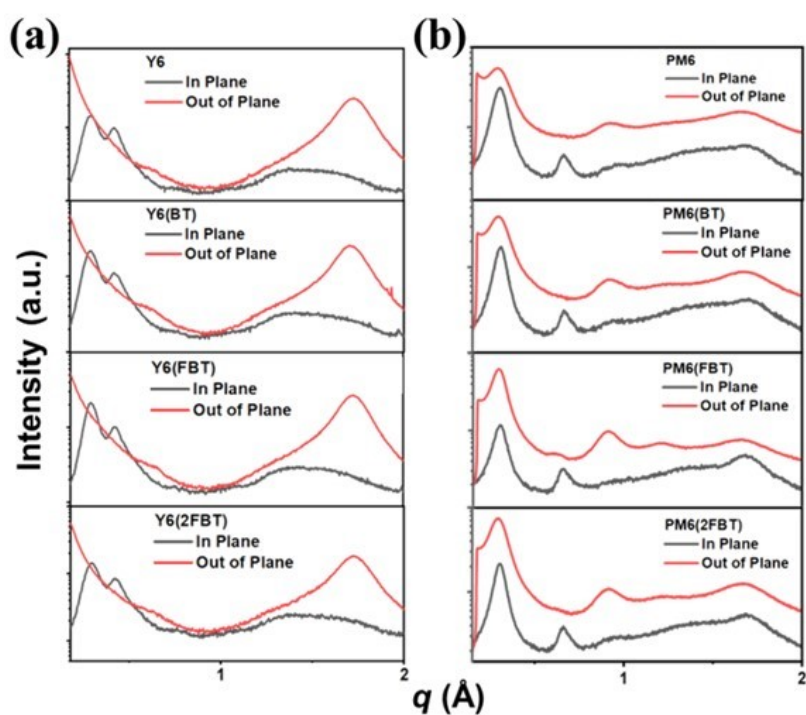

Fig. S2 line cut profiles of the a) Y6 films and b) PM6 without and with BT solid additives.

**Table S1** Lattice parameters for Y6 neat films without and with BT solid additives.

| System   | Out-of-Plane                 |                               |                            |                                   | In-Plane                  |                               |                            |                                   |
|----------|------------------------------|-------------------------------|----------------------------|-----------------------------------|---------------------------|-------------------------------|----------------------------|-----------------------------------|
|          | $\pi$ - $\pi$ stacking (010) |                               |                            |                                   | Lamellar packing (100)    |                               |                            |                                   |
|          | $q$ ( $\text{\AA}^{-1}$ )    | $d$ -spacing ( $\text{\AA}$ ) | FWHM ( $\text{\AA}^{-1}$ ) | Coherence length ( $\text{\AA}$ ) | $q$ ( $\text{\AA}^{-1}$ ) | $d$ -spacing ( $\text{\AA}$ ) | FWHM ( $\text{\AA}^{-1}$ ) | Coherence length ( $\text{\AA}$ ) |
| Y6       | 1.721                        | 3.650                         | 0.191                      | 29.873                            | 0.297                     | 21.160                        | 0.084                      | 67.429                            |
| Y6(BT)   | 1.710                        | 3.672                         | 0.197                      | 28.955                            | 0.291                     | 21.611                        | 0.082                      | 68.982                            |
| Y6(FBT)  | 1.725                        | 3.643                         | 0.205                      | 27.906                            | 0.293                     | 21.471                        | 0.074                      | 68.731                            |
| Y6(2FBT) | 1.727                        | 3.638                         | 0.207                      | 27.638                            | 0.295                     | 21.303                        | 0.083                      | 68.607                            |

**Table S2** Lattice parameters for PM6 neat films without and with BT solid additives.

| System    | Out-of-Plane                 |                               |                            |                                   |                            |                               |                            |                                   |
|-----------|------------------------------|-------------------------------|----------------------------|-----------------------------------|----------------------------|-------------------------------|----------------------------|-----------------------------------|
|           | $\pi$ - $\pi$ stacking (010) |                               |                            |                                   | Lamellar packing ( $h00$ ) |                               |                            |                                   |
|           | $q$ ( $\text{\AA}^{-1}$ )    | $d$ -spacing ( $\text{\AA}$ ) | FWHM ( $\text{\AA}^{-1}$ ) | Coherence length ( $\text{\AA}$ ) | $q$ ( $\text{\AA}^{-1}$ )  | $d$ -spacing ( $\text{\AA}$ ) | FWHM ( $\text{\AA}^{-1}$ ) | Coherence length ( $\text{\AA}$ ) |
| PM6       | 1.636                        | 3.840                         | 0.370                      | 15.427                            | 0.918                      | 6.842                         | 0.157                      | 36.195                            |
| PM6(BT)   | 1.662                        | 3.775                         | 0.212                      | 26.979                            | 0.919                      | 6.840                         | 0.144                      | 39.295                            |
| PM6(FBT)  | 1.650                        | 3.809                         | 0.276                      | 20.672                            | 0.912                      | 6.890                         | 0.118                      | 47.966                            |
| PM6(2FBT) | 1.655                        | 3.797                         | 0.199                      | 28.684                            | 0.911                      | 6.900                         | 0.138                      | 41.223                            |

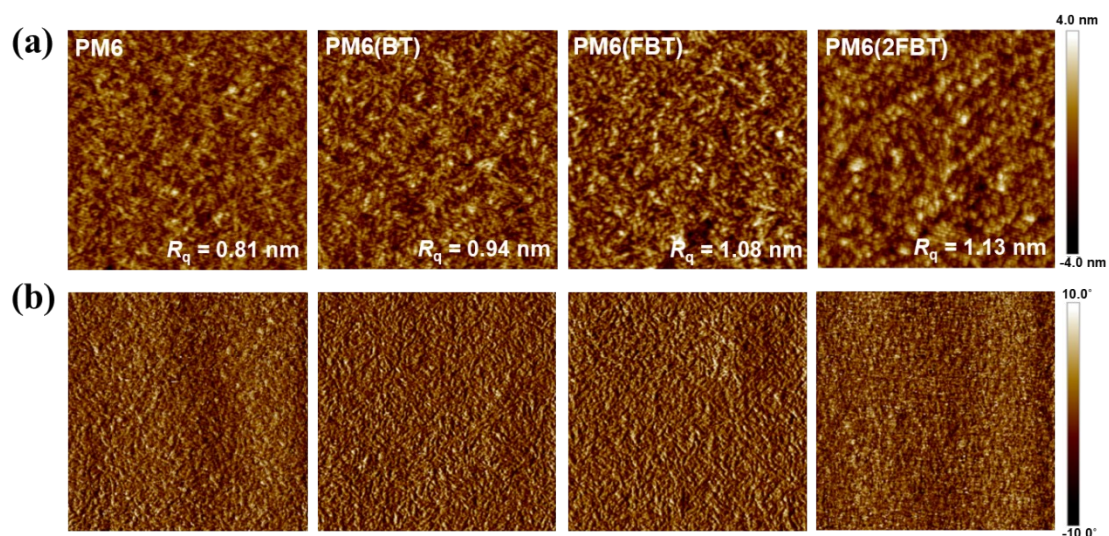

**Fig. S3** a) Height and b) phase AFM images (scan size  $2 \times 2 \mu\text{m}$ ) of PM6 neat films without and with BT solid additives.

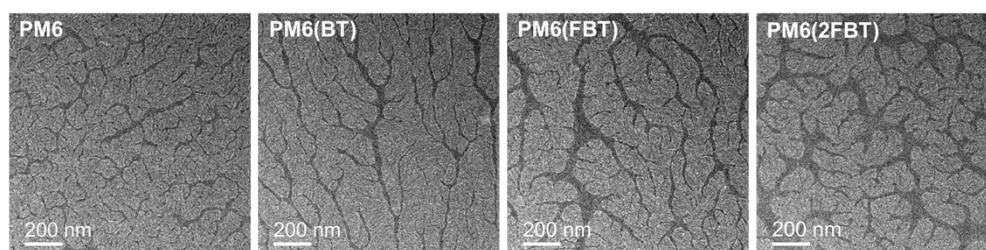

**Fig. S4** TEM images of PM6 neat films without and with BT solid additives (magnification of 15.5k).

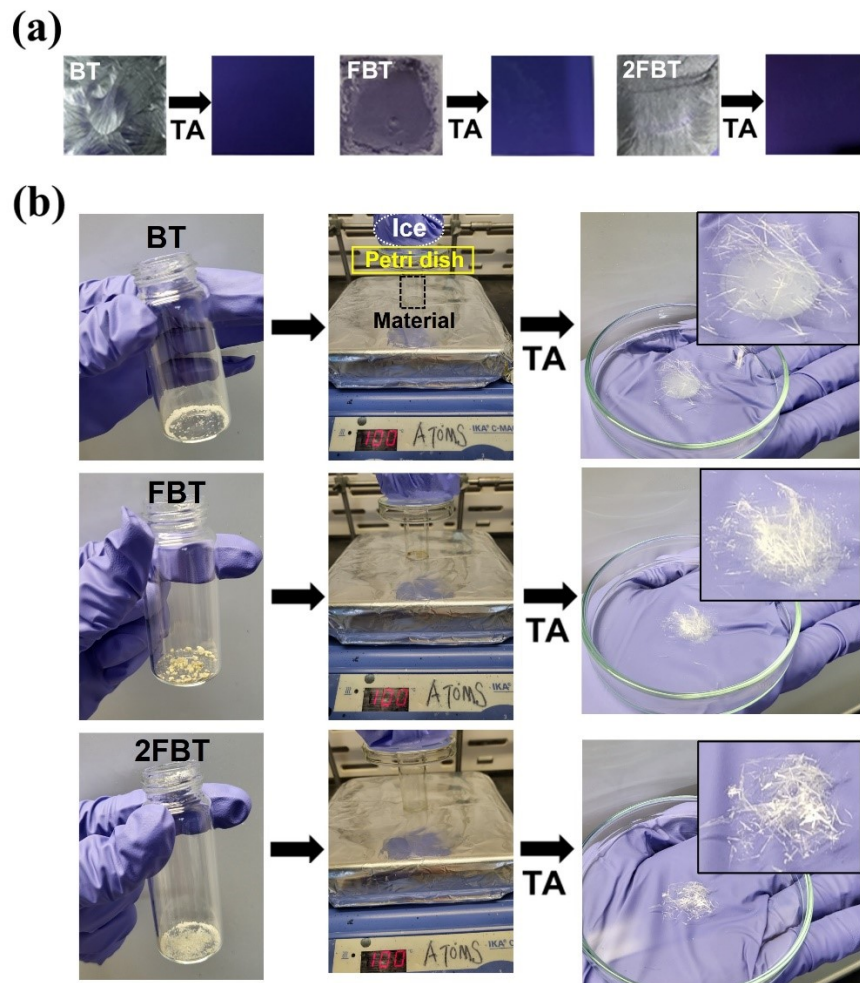

**Fig. S5** Photographs of BT solid additives (a) film on the Si substrate and (b) bulk in the vial followed by thermal annealing at 100 °C for 5 min.



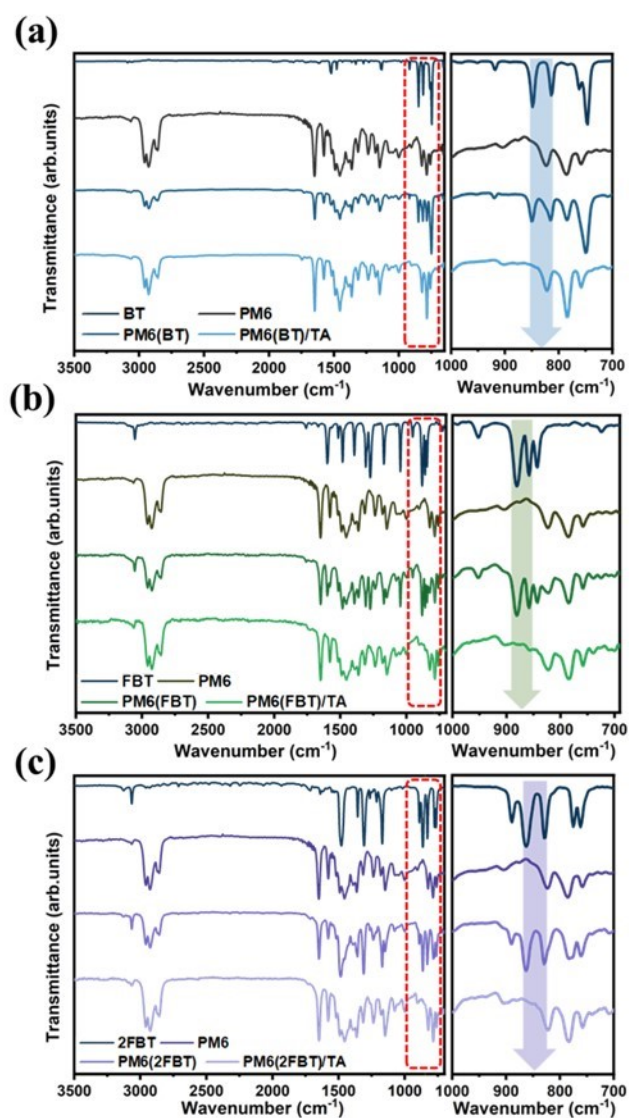

**Fig. S6** FT-IR spectra of PM6 films with a) BT, b) FBT, and c) 2FBT under TA at 80 °C for 5 min.

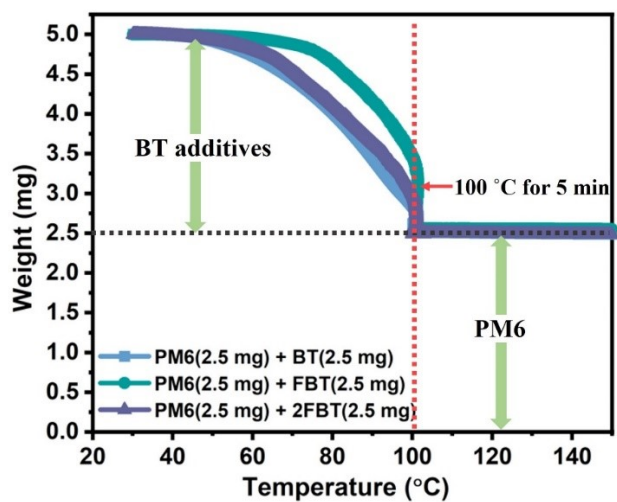

**Fig. S7** TGA plot of PM6:BT-solid additives (weight ratio of 1:1) at a scan rate of 10.0 °C min<sup>-1</sup> and in the heating process, the temperature was held for 5 min at 100 °C.

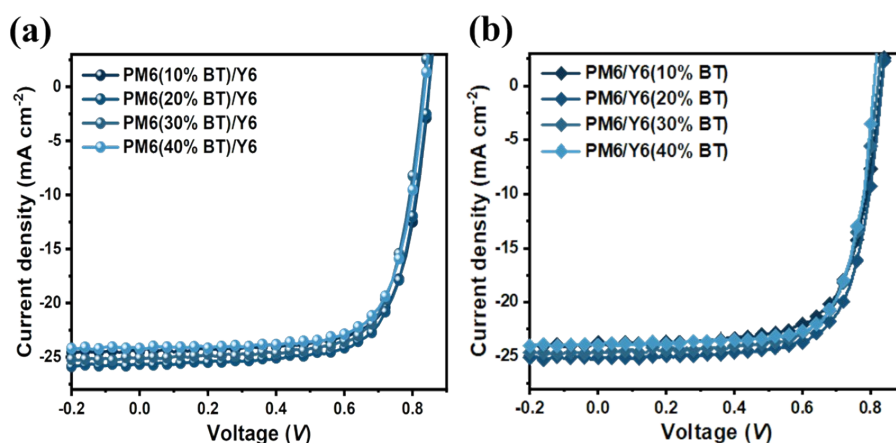

**Fig. S8** *J-V* curves of the PM6/Y6 LBL system with a different weight ratio of BT additive on a) donor and b) acceptor layer.

**Table S3** Summary of device parameters of PM6/Y6 devices with different weight ratios of BT additive on donor or acceptor layer under illumination of AM 1.5G (100 mW cm<sup>-2</sup>).

| System         | $V_{oc}^a)$<br>[V] | $J_{sc}^a)$<br>[mA cm <sup>-2</sup> ] | FF <sup>a)</sup><br>[%] | PCE <sup>a)</sup><br>[%] |
|----------------|--------------------|---------------------------------------|-------------------------|--------------------------|
| PM6(10% BT)/Y6 | 0.849<br>(0.843)   | 24.58<br>(24.20)                      | 71.52<br>(71.23)        | 14.93<br>(14.51)         |
| PM6(20% BT)/Y6 | 0.849<br>(0.842)   | 25.70<br>(25.17)                      | 71.02<br>(70.45)        | 15.49<br>(15.21)         |
| PM6(30% BT)/Y6 | 0.843<br>(0.840)   | 25.05<br>(24.88)                      | 70.87<br>(70.68)        | 14.97<br>(14.76)         |
| PM6(40% BT)/Y6 | 0.840<br>(0.832)   | 24.17<br>(23.85)                      | 70.60<br>(70.35)        | 14.33<br>(13.93)         |
| PM6/Y6(10% BT) | 0.836<br>(0.836)   | 24.48<br>(24.39)                      | 70.24<br>(70.03)        | 14.37<br>(14.28)         |
| PM6/Y6(20% BT) | 0.835<br>(0.833)   | 25.13<br>(24.87)                      | 70.78<br>(70.61)        | 14.85<br>(14.63)         |
| PM6/Y6(30% BT) | 0.832<br>(0.831)   | 24.60<br>(24.43)                      | 70.55<br>(70.37)        | 14.44<br>(14.29)         |
| PM6/Y6(40% BT) | 0.822<br>(0.819)   | 24.06<br>(23.65)                      | 70.26<br>(69.57)        | 13.89<br>(13.38)         |

<sup>a)</sup> the statistical values in parentheses are obtained from 16 cells.

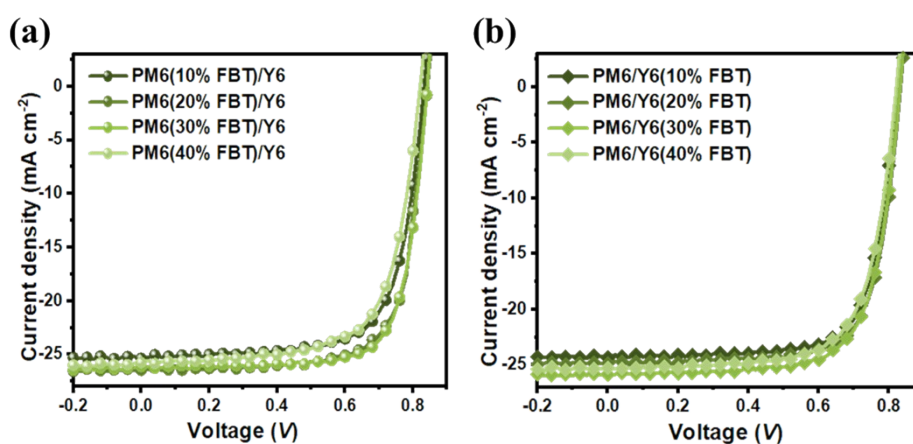

**Fig. S9** *J*-*V* curves of the PM6/Y6 LBL system with a different weight ratio of FBT additive on a) donor and b) acceptor layer.

**Table S4** Summary of device parameters of PM6/Y6 devices with different weight ratios of FBT additive on donor or acceptor layer under illumination of AM 1.5G (100 mW cm<sup>-2</sup>).

| System          | $V_{oc}$ <sup>a)</sup><br>[V] | $J_{sc}$ <sup>a)</sup><br>[mA cm <sup>-2</sup> ] | FF <sup>a)</sup><br>[%] | PCE <sup>a)</sup><br>[%] |
|-----------------|-------------------------------|--------------------------------------------------|-------------------------|--------------------------|
| PM6(10% FBT)/Y6 | 0.845<br>(0.840)              | 25.19<br>(24.93)                                 | 74.90<br>(73.67)        | 15.94<br>(15.43)         |
| PM6(20% FBT)/Y6 | 0.843<br>(0.841)              | 25.73<br>(25.36)                                 | 75.72<br>(75.48)        | 16.42<br>(16.09)         |
| PM6(30% FBT)/Y6 | 0.842<br>(0.840)              | 26.14<br>(25.83)                                 | 75.31<br>(75.19)        | 16.63<br>(16.31)         |
| PM6(40% FBT)/Y6 | 0.838<br>(0.835)              | 25.44<br>(25.20)                                 | 73.22<br>(72.81)        | 15.61<br>(15.32)         |
| PM6/Y6(10% FBT) | 0.833<br>(0.832)              | 24.74<br>(24.35)                                 | 71.27<br>(71.06)        | 14.69<br>(14.39)         |
| PM6/Y6(20% FBT) | 0.833<br>(0.833)              | 25.02<br>(24.88)                                 | 71.52<br>(71.32)        | 14.91<br>(14.78)         |
| PM6/Y6(30% FBT) | 0.831<br>(0.828)              | 25.48<br>(25.15)                                 | 71.68<br>(71.27)        | 15.40<br>(15.03)         |
| PM6/Y6(40% FBT) | 0.825<br>(0.825)              | 25.28<br>(25.08)                                 | 70.84<br>(70.55)        | 14.77<br>(14.60)         |

<sup>a)</sup> the statistical values in parentheses are obtained from 16 cells.

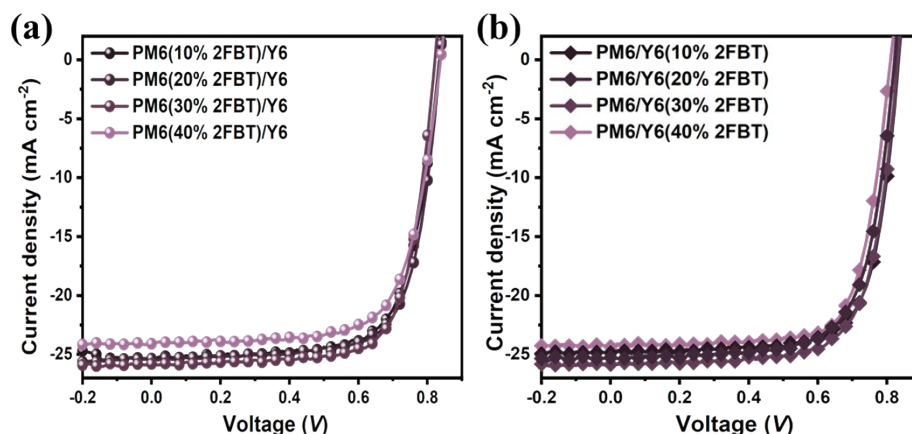

**Fig. S10** *J-V* curves of the PM6/Y6 LBL system with a different weight ratio of 2FBT additive on a) donor and b) acceptor layer.

**Table S5** Summary of device parameters of PM6/Y6 devices with different weight ratios of 2FBT additive on donor or acceptor layer under illumination of AM 1.5G (100 mW cm<sup>-2</sup>).

| System           | $V_{oc}$ <sup>a)</sup><br>[V] | $J_{sc}$ <sup>a)</sup><br>[mA cm <sup>-2</sup> ] | FF <sup>a)</sup><br>[%] | PCE <sup>a)</sup><br>[%] |
|------------------|-------------------------------|--------------------------------------------------|-------------------------|--------------------------|
| PM6(10% 2FBT)/Y6 | 0.842<br>(0.840)              | 25.43<br>(24.81)                                 | 70.02<br>(69.83)        | 14.99<br>(14.54)         |
| PM6(20% 2FBT)/Y6 | 0.840<br>(0.842)              | 25.71<br>(25.41)                                 | 71.32<br>(70.90)        | 15.40<br>(15.17)         |
| PM6(30% 2FBT)/Y6 | 0.839<br>(0.834)              | 25.83<br>(25.41)                                 | 72.88<br>(72.30)        | 15.79<br>(15.32)         |
| PM6(40% 2FBT)/Y6 | 0.835<br>(0.833)              | 24.52<br>(23.95)                                 | 71.47<br>(71.14)        | 14.63<br>(14.20)         |
| PM6/Y6(10% 2FBT) | 0.835<br>(0.835)              | 24.67<br>(24.37)                                 | 70.03<br>(69.88)        | 14.43<br>(14.22)         |
| PM6/Y6(20% 2FBT) | 0.834<br>(0.833)              | 24.93<br>(24.81)                                 | 70.42<br>(70.27)        | 14.64<br>(14.52)         |
| PM6/Y6(30% 2FBT) | 0.830<br>(0.830)              | 25.31<br>(25.18)                                 | 70.98<br>(70.75)        | 14.91<br>(14.78)         |
| PM6/Y6(40% 2FBT) | 0.828<br>(0.826)              | 24.22<br>(24.00)                                 | 70.56<br>(70.36)        | 14.15<br>(13.95)         |

<sup>a)</sup> the statistical values in parentheses are obtained from 16 cells.

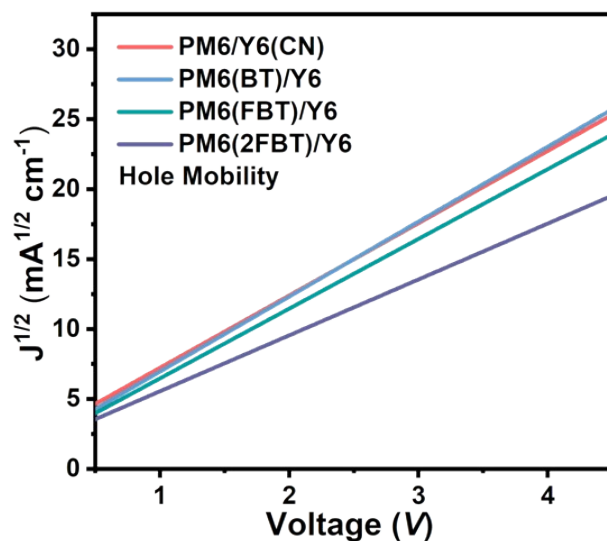

**Fig. S11** SCLC plots of hole only devices with PM6/Y6 LBL system with optimized additives.

**Table S6** Hole mobility parameters of the PM6/Y6 devices with optimized additives.

| System       | $\mu_h$<br>[ $\text{cm}^2\text{V}^{-1}\text{s}^{-1}$ ] |
|--------------|--------------------------------------------------------|
| PM6/Y6(CN)   | $4.92 \times 10^{-4}$                                  |
| PM6(BT)/Y6   | $5.12 \times 10^{-4}$                                  |
| PM6(FBT)/Y6  | $5.67 \times 10^{-4}$                                  |
| PM6(2FBT)/Y6 | $5.49 \times 10^{-4}$                                  |

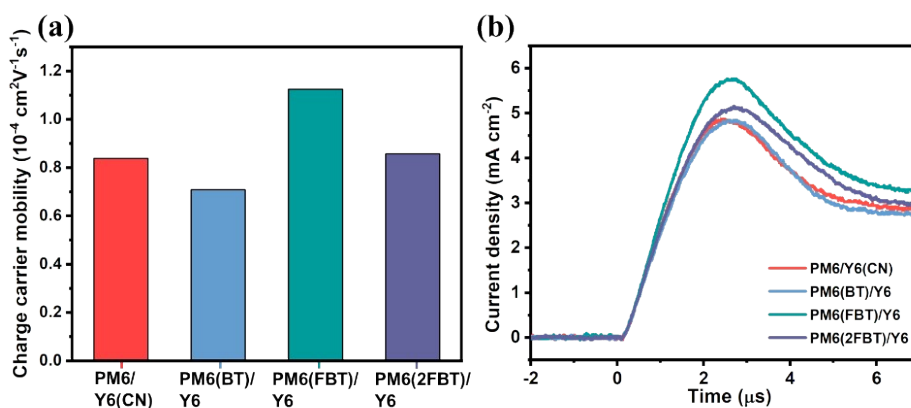

**Fig. S12** a) Charge carrier mobility of LBL-based devices calculated from photo-CELIV. b) Photo-CELIV measurement on the optimized devices.

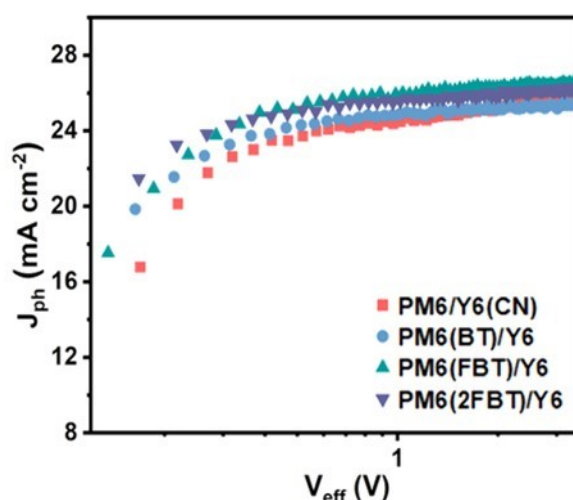

**Fig. S13**  $J_{ph}$  versus  $V_{eff}$  plots of the PM6/Y6 PSCs with optimized additives.

**Table S7** Exciton dissociation probabilities and charge extraction probabilities of the devices.

| System       | Exciton dissociation probability (%) | Charge extraction probability (%) |
|--------------|--------------------------------------|-----------------------------------|
| PM6/Y6(CN)   | 97.71                                | 76.21                             |
| PM6(BT)/Y6   | 97.42                                | 75.06                             |
| PM6(FBT)/Y6  | 99.13                                | 78.88                             |
| PM6(2FBT)/Y6 | 98.81                                | 77.35                             |

**Table S8** Lattice parameters in out-of-plane and in-plane direction for LBL active layer films with optimized additives.

| System       | Out-of-Plane                 |                               |                            |                                   | In-Plane                  |                               |                            |                                   |
|--------------|------------------------------|-------------------------------|----------------------------|-----------------------------------|---------------------------|-------------------------------|----------------------------|-----------------------------------|
|              | $\pi$ - $\pi$ stacking (010) |                               |                            |                                   | Lamellar packing (100)    |                               |                            |                                   |
|              | $q$ ( $\text{\AA}^{-1}$ )    | $d$ -spacing ( $\text{\AA}$ ) | FWHM ( $\text{\AA}^{-1}$ ) | Coherence length ( $\text{\AA}$ ) | $q$ ( $\text{\AA}^{-1}$ ) | $d$ -spacing ( $\text{\AA}$ ) | FWHM ( $\text{\AA}^{-1}$ ) | Coherence length ( $\text{\AA}$ ) |
| PM6/Y6(CN)   | 1.721                        | 3.650                         | 0.219                      | 26.168                            | 0.309                     | 20.334                        | 0.079                      | 71.605                            |
| PM6(BT)/Y6   | 1.708                        | 3.678                         | 0.223                      | 25.614                            | 0.303                     | 20.712                        | 0.078                      | 72.522                            |
| PM6(FBT)/Y6  | 1.709                        | 3.672                         | 0.215                      | 26.646                            | 0.305                     | 20.579                        | 0.074                      | 76.308                            |
| PM6(2FBT)/Y6 | 1.713                        | 3.667                         | 0.211                      | 27.090                            | 0.304                     | 20.654                        | 0.074                      | 76.754                            |

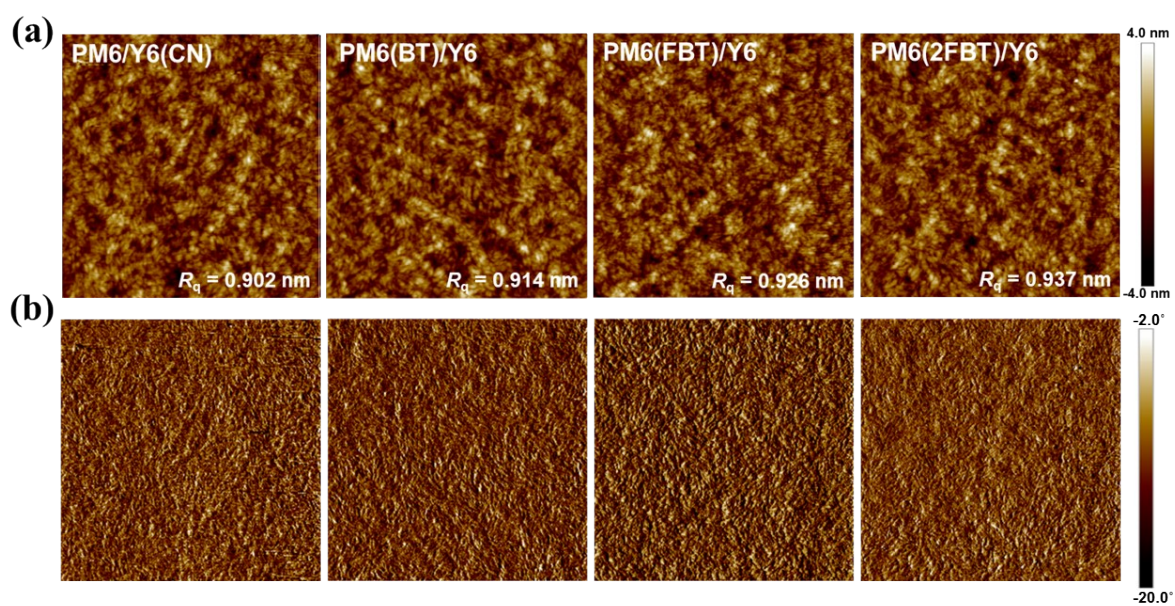

**Fig. S14** a) Height and b) phase AFM images (scan size  $2 \times 2 \mu\text{m}$ ) of PM6/Y6 LBL system with optimized additives.

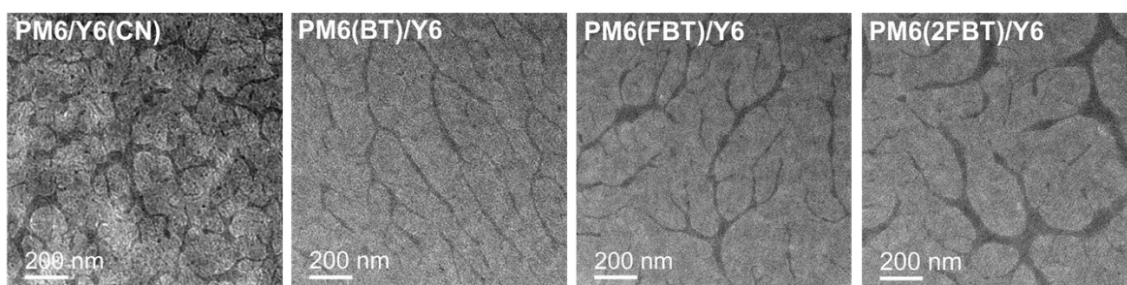

**Fig. S15** TEM images of PM6/Y6 LBL system with optimized additives (magnification of 15.5k).

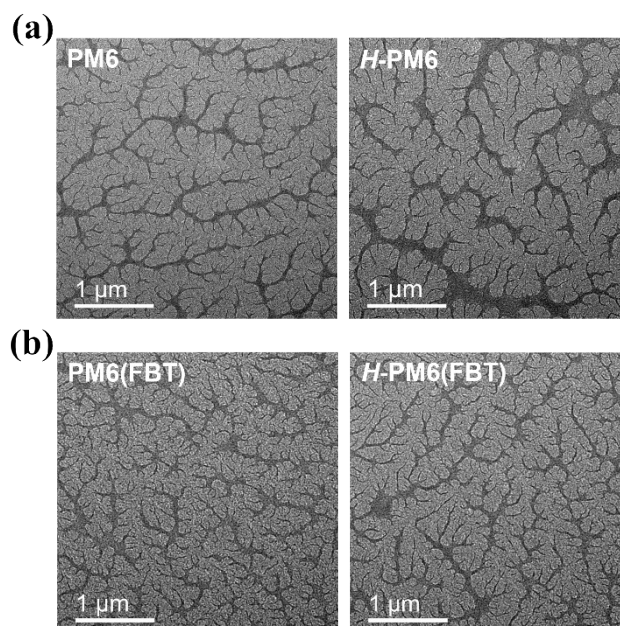

**Fig. S16** TEM images of PM6 neat films with different molecular weights depending on the a) without and b) with FBT solid additive (magnification of 5.6k).

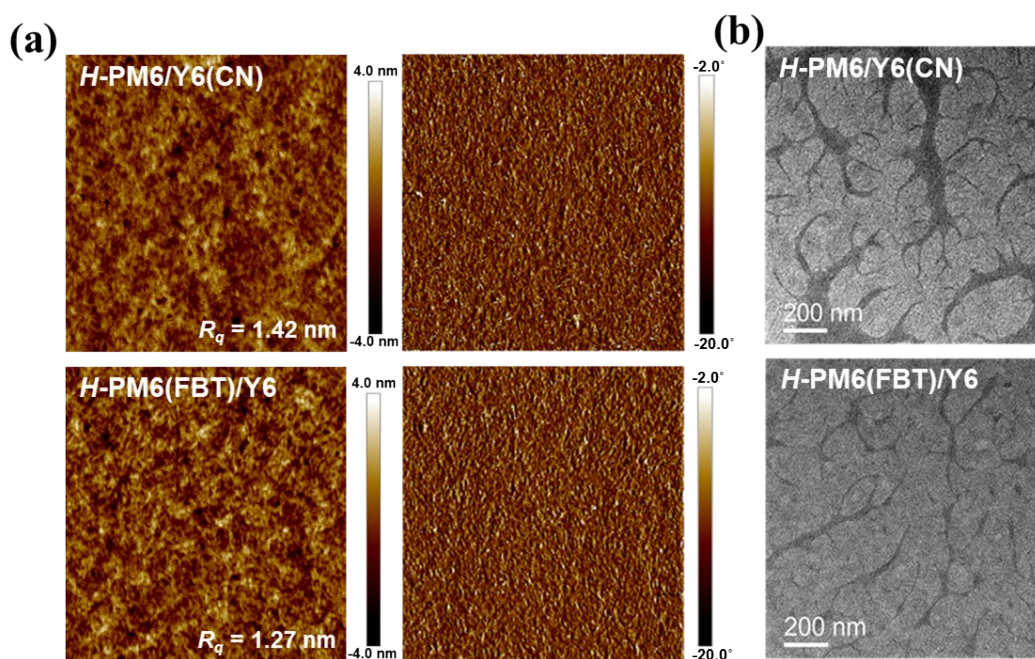

**Fig. S17** a) AFM (scan size  $2 \times 2 \mu\text{m}$ ) and b) TEM images (magnification of 15.5k) of H-PM6/Y6 LBL system with optimized additives.



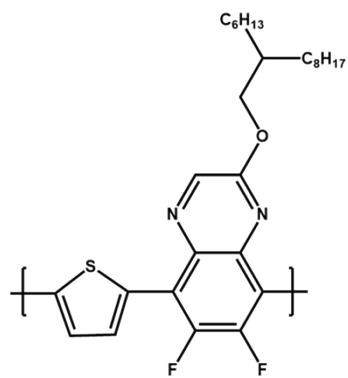

**PTQ10**

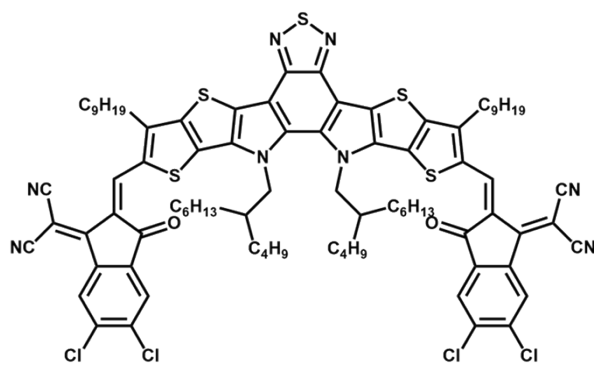

**BTP-eC9**

**Fig. S18** Chemical structures of PTQ10 and BTP-eC9.

**Table S9** Summary of recently reported LBL PSCs.

| Year | Active layer      | Processing Solvent                 | $V_{oc}$ [V] | $J_{sc}$ [ $\text{mA cm}^{-2}$ ] | FF [%] | PCE [%] | Reference |
|------|-------------------|------------------------------------|--------------|----------------------------------|--------|---------|-----------|
| 2019 | PTQ10/IDIC        | CF/CF                              | 0.943        | 18.75                            | 69.66  | 12.32   | 1         |
| 2020 | PTQ10/Y6          | CF/CF                              | 0.849        | 24.49                            | 72.63  | 15.10   | 2         |
| 2020 | PM6/Y6-2Cl        | CF/CF                              | 0.849        | 25.88                            | 72.30  | 15.89   | 2         |
| 2020 | PM6/Y6-C2         | CF/CF                              | 0.834        | 25.82                            | 73.99  | 15.93   | 2         |
| 2020 | PM6/Y6            | CF/CF                              | 0.840        | 25.22                            | 72.49  | 16.35   | 2         |
| 2020 | PT2/Y6            | CB/CF                              | 0.83         | 26.7                             | 74.4   | 16.5    | 3         |
| 2021 | PM6/Y6            | CB/CF                              | 0.800        | 24.5                             | 73.5   | 14.42   | 4         |
| 2021 | PM6/N3:PC71BM     | CF/CF                              | 0.841        | 26.49                            | 78.2   | 17.42   | 5         |
| 2021 | PM6/BTP-eC9       | <i>o</i> -xylene/ <i>o</i> -xylene | 0.840        | 26.65                            | 78.1   | 17.48   | 6         |
| 2021 | PM6/BTP-eC9       | CF/CF                              | 0.839        | 26.91                            | 77.7   | 17.54   | 6         |
| 2021 | PM6/BO-4Cl:BTP-S2 | CF/CF                              | 0.861        | 27.14                            | 78.04  | 18.16   | 7         |
| 2022 | PM6/Y6            | CF/CF                              | 0.861        | 25.76                            | 73.67  | 16.35   | 8         |
| 2022 | PM6/Y6:TIT-2Cl    | CF/CF                              | 0.876        | 26.63                            | 77.93  | 18.18   | 8         |

**Table S10** Summary of recently reported PM6-based PSCs treated with volatile solid additives.

| Year        | System     | Active layer       | Additive   | $V_{oc}$ [V] | $J_{sc}$ [ $\text{mA cm}^{-2}$ ] | FF [%]       | PCE [%]      | Reference       |
|-------------|------------|--------------------|------------|--------------|----------------------------------|--------------|--------------|-----------------|
| 2020        | BHJ        | PM6:Y6             | Ferrocene  | 0.838        | 26.71                            | 76.0         | 17.40        | 9               |
| 2020        | BHJ        | PBDB-T-2F:BTP-4F   | INB-5F     | 0.81         | 27.7                             | 74.3         | 16.4         | 10              |
| 2020        | BHJ        | PM6:TPT10          | BDT-1      | 0.899        | 24.80                            | 73.00        | 16.26        | 11              |
| 2021        | BHJ        | PBDB-TF:BO4Cl      | DTBF       | 0.846        | 26.2                             | 77.0         | 17.1         | 12              |
| 2021        | BHJ        | PM6:Y6             | Anthracene | 0.844        | 25.91                            | 77.8         | 17.02        | 13              |
| 2021        | BHJ        | PM6:Y6             | A3         | 0.82         | 26.50                            | 76.05        | 16.5         | 14              |
| 2021        | LBL        | PM6/Y6             | DDO        | 0.85         | 25.51                            | 77.45        | 16.93        | 15              |
| 2021        | LBL        | PBDB-TF/Y6         | DTBF       | 0.823        | 26.0                             | 76.6         | 16.4         | 16              |
| <b>2022</b> | <b>LBL</b> | <b>PM6/BTP-eC9</b> | <b>FBT</b> | <b>0.835</b> | <b>26.68</b>                     | <b>79.52</b> | <b>17.71</b> | <b>Our Work</b> |

**Table S11** PCE variations according to molecular weights of donor polymer on different systems.

| System                     | $\Delta$ PCE <sup>a)</sup> |
|----------------------------|----------------------------|
| PTQ10/Y6(DIO)              | 1.32                       |
| <i>H</i> -PTQ10/Y6(DIO)    |                            |
| PTQ10(FBT)/Y6              | 1.14                       |
| <i>H</i> -PTQ10(FBT)/Y6    |                            |
| PM6/BTP-eC9(DIO)           | 1.86                       |
| <i>H</i> -PM6/BTP-eC9(DIO) |                            |
| PM6(FBT)/BTP-eC9           | 1.52                       |
| <i>H</i> -PM6(FBT)/BTP-EC9 |                            |

<sup>a)</sup> the values follow this equation ( $PCE_{\text{donor/acceptor}} - PCE_{H\text{-donor/acceptor}}$ )

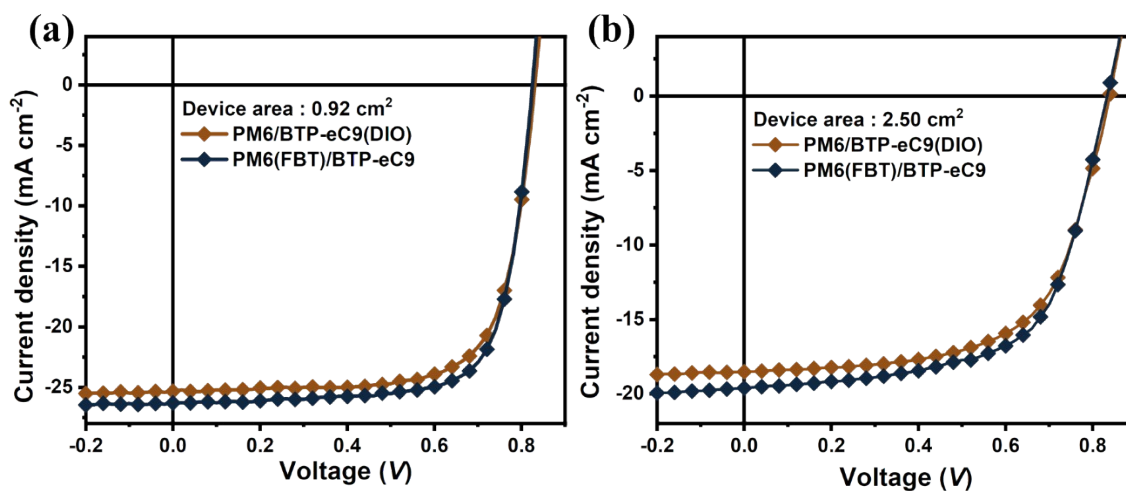

**Fig. S19** *J*-*V* curves of the PM6/BTP-eC9 LBL devices at (a) 0.92 cm<sup>2</sup> and (b) 2.50 cm<sup>2</sup>.

## Supporting Reference

- 1 R. Sun, J. Guo, C. Sun, T. Wang, Z. Luo, Z. Zhang, X. Jiao, W. Tang, C. Yang, Y. Li, J. Min, *Energy Environ. Sci.* 2019, **12**, 384.
- 2 R. Sun, Q. Wu, J. Guo, T. Wang, Y. Wu, B. Qiu, Z. Luo, W. Yang, Z. Hu, J. Guo, M. Shi, C. Yang, F. Huang, Y. Li, J. Min, *Joule* 2020, **4**, 407.
- 3 K. Weng, L. Ye, L. Zhu, J. Xu, J. Zhou, X. Feng, G. Lu, S. Tan, F. Liu, Y. Sun, *Nat. Commun.* 2020, **11**, 2855.
- 4 X. Xie, J. Liao, J. Liu, Y. Meng, W. Huang, X. Zhan, L.-M. Wang, Q. Li, T. Zhu, S. Liu, Y.-P. Cai, *Phys. Status Solidi RRL* 2021, **15**, 2100386.
- 5 K. Jiang, J. Zhang, Z. Peng, F. Lin, S. Wu, Z. Li, Y. Chen, H. Yan, H. Ade, Z. Zhu, A. K. Y. Jen, *Nat. Commun.* 2021, **12**, 468.
- 6 Y. Zhang, K. Liu, J. Huang, X. Xia, J. Cao, G. Zhao, P. W. K. Fong, Y. Zhu, F. Yan, Y. Yang, X. Lu, G. Li, *Nat. Commun.* 2021, **12**, 4815.
- 7 L. Zhan, S. Li, X. Xia, Y. Li, X. Lu, L. Zuo, M. Shi, H. Chen, *Adv. Mater.* 2021, **33**, 2007231.
- 8 J. Chen, J. Cao, L. Liu, L. Xie, H. Zhou, J. Zhang, K. Zhang, M. Xiao, F. Huang, *Adv. Funct. Mater.* 2200629.
- 9 L. Ye, Y. Cai, C. Li, L. Zhu, J. Xu, K. Weng, K. Zhang, M. Huang, M. Zeng, T. Li, E. Zhou, S. Tan, X. Hao, Y. Yi, F. Liu, Z. Wang, X. Zhan, Y. Sun, *Energy Environ. Sci.* 2020, **13**, 5117.
- 10 J. Cai, H. Wang, X. Zhang, W. Li, D. Li, Y. Mao, B. Du, M. Chen, Y. Zhuang, D. Liu, H.-L. Qin, Y. Zhao, J. A. Smith, R. C. Kilbride, A. J. Parnell, R. A. L. Jones, D. G. Lidzey, T. Wang, *J. Mater. Chem. A* 2020, **8**, 4230.
- 11 Y. Zhang, Y. Cho, J. Lee, J. Oh, S.-H. Kang, S. M. Lee, B. Lee, L. Zhong, B. Huang, S. Lee, J.-W. Lee, B. J. Kim, Y. Li, C. Yang, *J. Mater. Chem. A* 2020, **8**, 13049.
- 12 R. Yu, H. Yao, Y. Xu, J. Li, L. Hong, T. Zhang, Y. Cui, Z. Peng, M. Gao, L. Ye, Z. a. Tan, J. Hou, *Adv. Funct. Mater.* 2021, **31**, 2010535.
- 13 H. Fan, H. Yang, Y. Wu, O. Yildiz, X. Zhu, T. Marszalek, P. W. M. Blom, C. Cui, Y. Li, *Adv. Funct. Mater.* 2021, **31**, 2103944.
- 14 J. Fu, S. Chen, K. Yang, S. Jung, J. Lv, L. Lan, H. Chen, D. Hu, Q. Yang, T. Duan, Z. Kan, C. Yang, K. Sun, S. Lu, Z. Xiao, Y. Li, *iScience* 2020, **23**, 100965.
- 15 X. Wang, L. Zhang, L. Hu, Z. Xie, H. Mao, L. Tan, Y. Zhang, Y. Chen, *Adv. Funct. Mater.* 2021, **31**, 2102291.
- 16 R. Yu, G. Wu, Y. Cui, X. Wei, L. Hong, T. Zhang, C. Zou, S. Hu, J. Hou, Z. a. Tan, *Small* 2021, **17**, 2103497
